# Supplementary material for: Luminescence Properties of an Orthorhombic KLaF4 Phosphor Doped with Pr3+ Ions under Vacuum Ultraviolet and Visible Excitation
Source: MDPI journal article supplement (doi:10.3390/ma17061410), 2024-03-19
Supplement: s1 [file s1]

# Supplementary Materials

## Luminescence Properties of an Orthorhombic KLaF<sub>4</sub> Phosphor Doped with Pr<sup>3+</sup> Ions under Vacuum Ultraviolet and Visible Excitation

Patrycja Zdeb, Nadiia Rebrova, Radosław Lisiecki and Przemysław Jacek Deren \*

Institute of Low Temperature and Structure Research, Polish Academy of Science, Okólna Street 2, 50-422 Wrocław, Poland; p.zdeb@intibs.pl (P.Z.); n.rebrova@intibs.pl (N.R.); r.lisiecki@intibs.pl (R.L.)

\* Correspondence: p.deren@intibs.pl

**Table S1.** Lattice parameters and unit cell volume of KLaF<sub>4</sub>:Pr<sup>3+</sup> nanoparticles.

|                                         | <i>a</i> (Å) | <i>b</i> (Å) | <i>c</i> (Å) | <i>V</i> (Å <sup>3</sup> ) |
|-----------------------------------------|--------------|--------------|--------------|----------------------------|
| KLaF <sub>4</sub>                       | 6.3299       | 3.8509       | 15.6801      | 382.21                     |
| KLaF <sub>4</sub> :0.1%Pr <sup>3+</sup> | 6.3290       | 3.8509       | 15.6799      | 382.15                     |
| KLaF <sub>4</sub> :0.5%Pr <sup>3+</sup> | 6.3285       | 3.8506       | 15.6755      | 381.98                     |
| KLaF <sub>4</sub> :1%Pr <sup>3+</sup>   | 6.3232       | 3.8501       | 15.6723      | 381.54                     |
| KLaF <sub>4</sub> :1.5%Pr <sup>3+</sup> | 6.3228       | 3.8499       | 15.6699      | 381.44                     |
| KLaF <sub>4</sub> :2%Pr <sup>3+</sup>   | 6.3227       | 3.8498       | 15.6696      | 381.41                     |

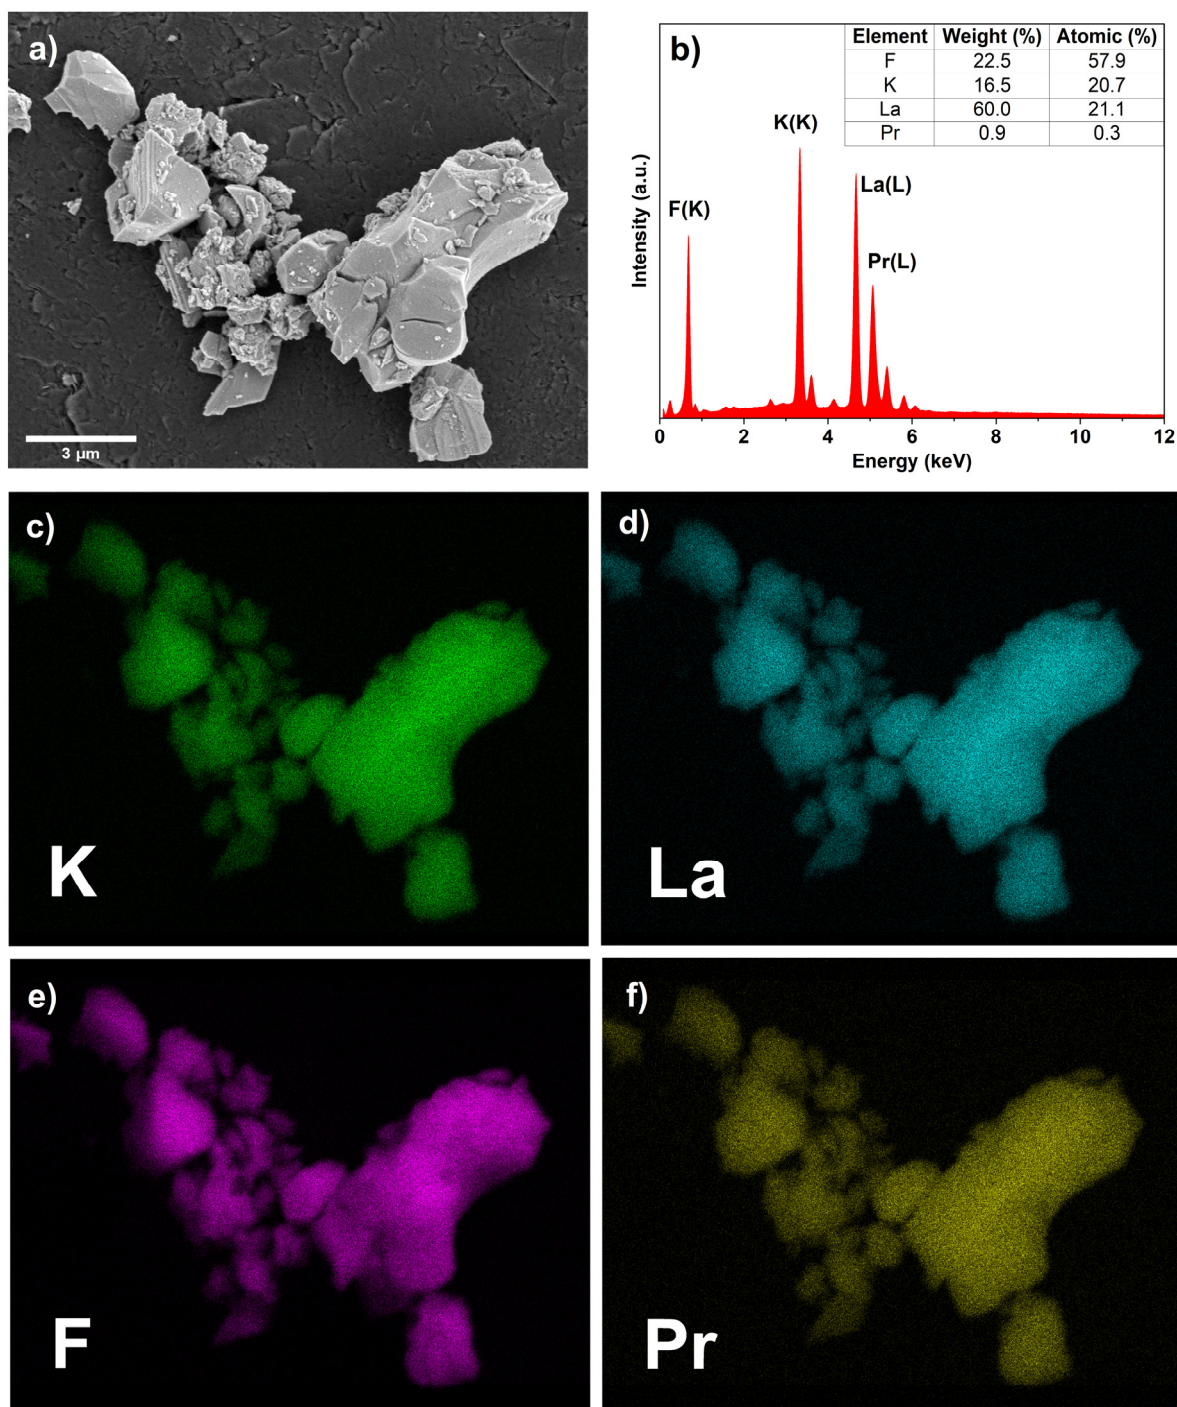

**Figure S1.** a) SEM image of analyzed grain. b) EDS spectrum of  $\text{KLaF}_4:1.5\%\text{Pr}^{3+}$  sample; inset shows weight and atomic percentage of elements in the matrix. c-f) EDS element mapping.

**Table S2.** Information about bands observed in the excitation and emission spectra of KLaF<sub>4</sub>:1%Pr<sup>3+</sup> measured in the UV range.

| Excitation                  |                         |                |                          |                         |
|-----------------------------|-------------------------|----------------|--------------------------|-------------------------|
| Transition                  | $E$ (cm <sup>-1</sup> ) | $\lambda$ (nm) | FWHM (cm <sup>-1</sup> ) | Peak number             |
| $^3H_4 \rightarrow 4f^5d^1$ | 52880                   | 189            | 3486                     | 1                       |
|                             | 55872                   | 179            | 5291                     | 2                       |
|                             | 60480                   | 165            | 2808                     | 3                       |
|                             | 62408                   | 160            | 2177                     | 4                       |
|                             | 64472                   | 155            | 4177                     | 5                       |
| Emission                    |                         |                |                          |                         |
| Transition                  | $E$ (cm <sup>-1</sup> ) | $\lambda$ (nm) | FWHM (cm <sup>-1</sup> ) | $\beta_{\text{ex}}$ [%] |
| $^1S_0 \rightarrow ^3H_4$   | 46189                   | 216            | 1177                     | 3.8                     |
| $^1S_0 \rightarrow ^3H_6$   | 42463                   | 236            | 1140                     | 1.8                     |
| $^1S_0 \rightarrow ^3F_3$   | 39761                   | 252            | 845                      | 17.8                    |
| $^1S_0 \rightarrow ^1G_4$   | 36630                   | 273            | 742                      | 25.8                    |
| $^1S_0 \rightarrow ^1D_2$   | 29630                   | 338            | 615                      | 10.9                    |
| $^1S_0 \rightarrow ^1I_6$   | 24661                   | 406            | 776                      | 39.8                    |
| $^3P_0 \rightarrow ^3H_4$   | 20640                   | 484            | 315                      |                         |

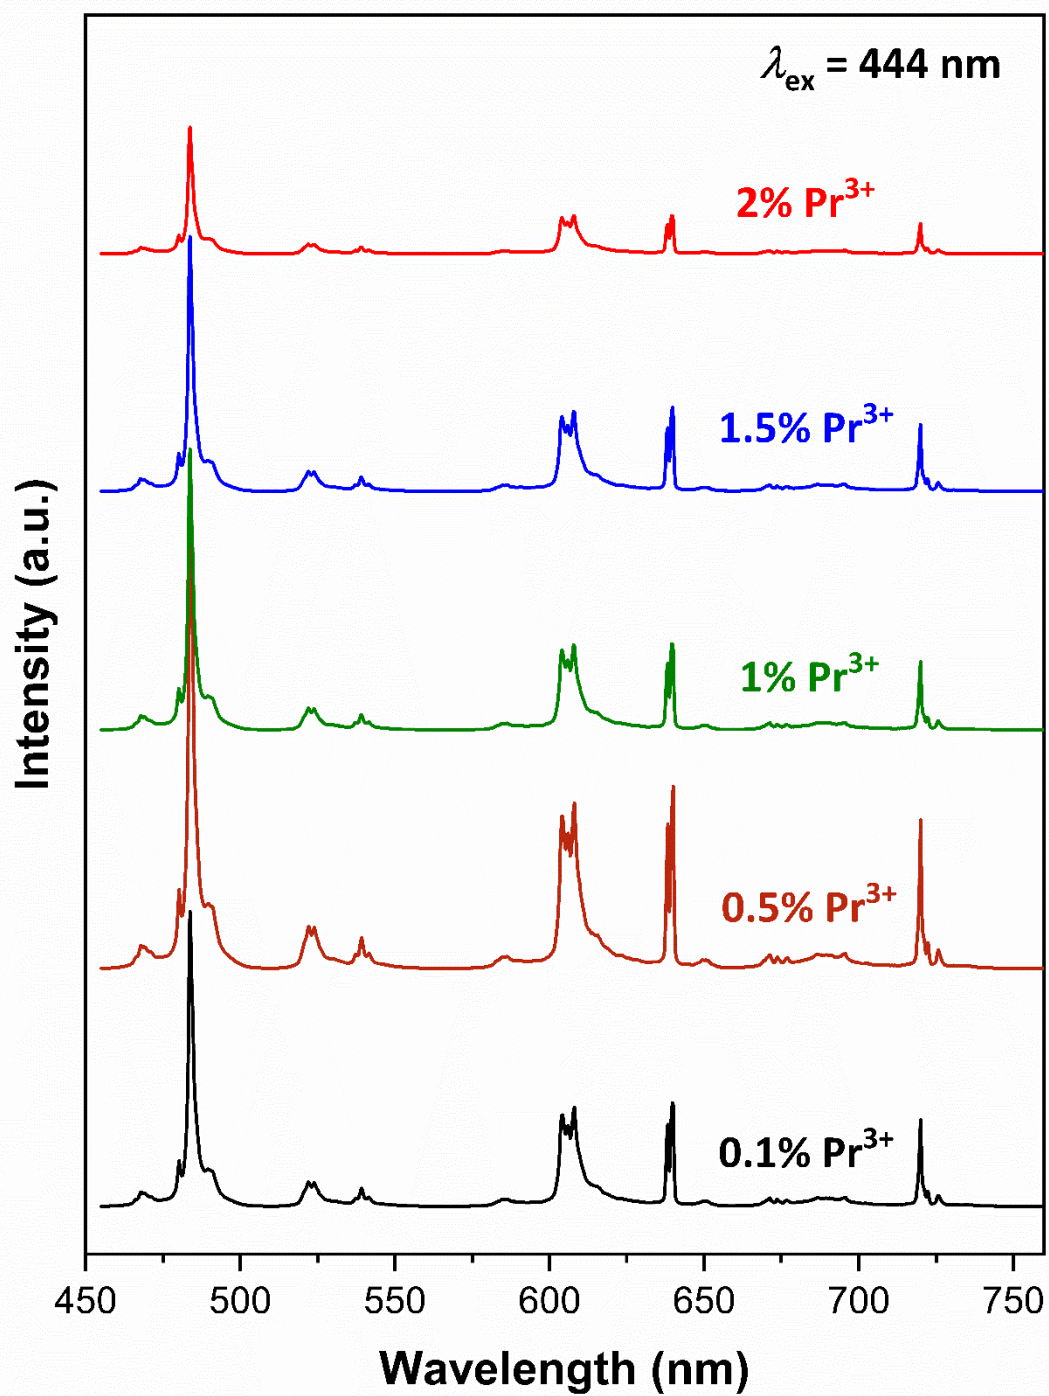

**Figure S2.** Emission spectra of KLaF<sub>4</sub> doped with different Pr<sup>3+</sup> ion concentrations, measured under 444 nm excitation.

**Table S3.** Experimental energies of Pr<sup>3+</sup> Stark levels in KLaF<sub>4</sub> host.

| $^{2S+1}L_J$                | Experimental Stark-levels energy (cm <sup>-1</sup> ) | Experimental number of levels | Theoretical number of levels |
|-----------------------------|------------------------------------------------------|-------------------------------|------------------------------|
| <sup>3</sup> H <sub>4</sub> | 0, 114, 147, 186, 222                                | 5                             | 9                            |
| <sup>3</sup> H <sub>5</sub> | 2208, 2271, 2361                                     | 3                             | 11                           |
| <sup>3</sup> H <sub>6</sub> | 4275, 4321, 4374, 4425, 4457                         | 5                             | 13                           |
| <sup>3</sup> F <sub>2</sub> | 5143, 5146, 5175, 5188                               | 5                             | 5                            |
| <sup>3</sup> F <sub>3</sub> | 6410, 6432, 6454, 6509, 6570, 6581*                  | 6                             | 7                            |
| <sup>3</sup> F <sub>4</sub> | 6915, 6921, 6923, 6943, 6969                         | 5                             | 9                            |
| <sup>1</sup> G <sub>4</sub> | 9694*                                                | 1                             | 9                            |
| <sup>1</sup> D <sub>2</sub> | 16775*                                               | 1                             | 5                            |
| <sup>3</sup> P <sub>0</sub> | 20809                                                | 1                             | 1                            |
| <sup>3</sup> P <sub>1</sub> | 21352, 21411, 21431                                  | 3                             | 3                            |
| <sup>3</sup> P <sub>2</sub> | 22506, 22524, 22586, 22597                           | 2                             | 5                            |
| <sup>1</sup> S <sub>0</sub> | 46387*                                               | 1                             | 1                            |

\* Energies calculated based on the room temperature emission spectra (**Error! Reference source not found.**b and 5b).

**Table S4.** Comparison of the maximum relative temperature sensitivities ( $S_{R\text{ MAX}}$  at given  $T_{\text{MAX}}$ ) of different  $\text{Ln}^{3+}$ -based luminescence thermometers working in the low-temperature range.

| Host                                                                                                                                            | Dopant                             | $T_{\text{MAX}}$ [K] | $S_{R\text{ MAX}}$ (%K <sup>-1</sup> ) | Reference |
|-------------------------------------------------------------------------------------------------------------------------------------------------|------------------------------------|----------------------|----------------------------------------|-----------|
| KLaF <sub>4</sub>                                                                                                                               | Pr <sup>3+</sup>                   | 140                  | 1.70                                   | This work |
| $\beta$ -NaYF <sub>4</sub>                                                                                                                      | Pr <sup>3+</sup>                   | 120                  | $\approx 5$                            | [1]       |
| Y <sub>2</sub> O <sub>3</sub>                                                                                                                   | Nd <sup>3+</sup>                   | 123                  | 1.51                                   | [2]       |
| NaYF <sub>4</sub>                                                                                                                               | Nd <sup>3+</sup>                   | 203                  | 16.3                                   | [3]       |
| fluoroindate glass                                                                                                                              | Er <sup>3+</sup>                   | 152                  | 2.8                                    | [4]       |
| NaGdF <sub>4</sub>                                                                                                                              | Yb <sup>3+</sup>                   | 125                  | $\approx 1.2$                          | [5]       |
| La <sub>2</sub> MgTiO <sub>6</sub>                                                                                                              | Cr <sup>3+</sup> , V <sup>4+</sup> | 165                  | 1.96                                   | [6]       |
| [GA]Mn(HCOO) <sub>3</sub>                                                                                                                       | Cr <sup>3+</sup>                   | 100                  | 1.20                                   | [7]       |
| (Me <sub>2</sub> NH <sub>2</sub> ) <sub>3</sub> [Eu <sub>3</sub> (FDC) <sub>4</sub> (NO <sub>3</sub> ) <sub>4</sub> ] $\cdot$ 4H <sub>2</sub> O | Eu <sup>3+</sup>                   | 170                  | 2.7                                    | [8]       |

#### REFERENCES:

1. Zhou, S.; Jiang, G.; Wei, X.; Duan, C.; Chen, Y.; Yin, M. Pr<sup>3+</sup>-Doped  $\beta$ -NaYF<sub>4</sub> for Temperature Sensing with Fluorescence Intensity Ratio Technique. *J. Nanosci. Nanotechnol.* **2014**, *14*, 3739–3742.
2. Kolesnikov, I. E.; Kalinichev, A. A.; Kurochkin, M. A.; Mamonova, D. V.; Kolesnikov, E. Y.; Lähderanta, E.; Mikhailov, M. D. Bifunctional heater-thermometer Nd<sup>3+</sup>-doped nanoparticles with multiple temperature sensing parameters. *Nanotechnology* **2019**, *30*, 145501.
3. Trejgis, K.; Ledwa, K.; Bednarkiewicz, A.; Marciniak, L. A single-band ratiometric luminescent thermometer based on tetrafluorides operating entirely in the Infrared Region. *Nanoscale Adv.* **2022**, *4*, 437–446.
4. Haro-González, P.; León-Luis, S. F.; González-Pérez, S.; Martín, I. R. Analysis of Er<sup>3+</sup> and Ho<sup>3+</sup> codoped fluoroindate glasses as wide range temperature sensor. *Mater. Res. Bull.* **2011**, *46*, 1051–1054.
5. Zheng, S.; Chen, W.; Tan, D.; Zhou, J.; Guo, Q.; Jiang, W.; Xu, C.; Liu, X.; Qiu, J. Lanthanide-doped NaGdF<sub>4</sub> core-shell nanoparticles for non-contact self-referencing temperature sensors. *Nanoscale* **2014**, *6*, 5675–5679.
6. Stefańska, D.; Bondzior, B.; Vu, T. H.; Grodzicki, M.; Dereń, P. J. Temperature sensitivity modulation through changing the vanadium concentration in a La<sub>2</sub>MgTiO<sub>6</sub>:V<sup>5+</sup>,Cr<sup>3+</sup> double perovskite optical thermometer. *Dalton Trans.* **2021**, *50*, 9851–9857.
7. Stefańska, D.; Kabański, A.; Vu, T. H.; Adaszyński, M.; Ptak, M. Structure, luminescence and temperature detection capability of [C(NH<sub>2</sub>)<sub>3</sub>]M(HCOO)<sub>3</sub> (M = Mg<sup>2+</sup>, Mn<sup>2+</sup>, Zn<sup>2+</sup>) hybrid organic–inorganic formate perovskites containing Cr<sup>3+</sup> ions. *Sensors* **2023**, *23*, 6259.
8. Li, L.; Zhu, Y.; Zhou, X.; Brites, C. D.; Ananias, D.; Lin, Z.; Paz, F. A.; Rocha, J.; Huang, W.; Carlos, L. D. Visible-light excited luminescent thermometer based on single lanthanide organic frameworks. *Adv. Funct. Mater.* **2016**, *26*, 8677–8684.
